# Supplementary material for: Structural Insights into the Quaternary Catalytic Mechanism of Hexameric Human Quinolinate Phosphoribosyltransferase, a Key Enzyme in de novo NAD Biosynthesis
Source: PubMed Central journal article supplement (PMC4726147; doi:10.1038/srep19681), 2016-01-25
Supplement: srep19681-s1.pdf [file srep19681-s1.pdf]

# Supplementary Information

## **Structural Insights into the Quaternary Catalytic Mechanism of Hexameric Human Quinolate Phosphoribosyltransferase, a Key Enzyme in *de novo* NAD Biosynthesis**

Hyung-Seop Youn<sup>1,2</sup>, Tae Gyun Kim<sup>1,2</sup>, Mun-Kyoung Kim<sup>1</sup>, Gil Bu Kang<sup>1</sup>, Jung Youn Kang<sup>1,2</sup>, Jung-Gyu Lee<sup>1,2</sup>, Jun Yop An<sup>1,2</sup>, Kyoung Ryoung Park<sup>1,2</sup>, Youngjin Lee<sup>1,2</sup>, Young Jun Im<sup>3</sup>, Jun Hyuck Lee<sup>4,5</sup> & Soo Hyun Eom<sup>1,2,6,\*</sup>

<sup>1</sup>School of Life Sciences, Gwangju Institute of Science and Technology, Gwangju 500-712, South Korea. <sup>2</sup>Steitz Center for Structural Biology, Gwangju Institute of Science and Technology, Gwangju 500-712, South Korea. <sup>3</sup>College of Pharmacy, Chonnam National University, Gwangju 500-757, South Korea. <sup>4</sup>Division of Polar Life Sciences, Korea Polar Research Institute, Incheon 406-840, South Korea. <sup>5</sup>Department of Polar Sciences, Korea University of Science and Technology, Incheon 406-840, South Korea. <sup>6</sup>Department of Chemistry, Gwangju Institute of Science and Technology, Gwangju 500-712, South Korea.

\*Corresponding author. E-mail address: eom@gist.ac.kr

## Supplementary Results

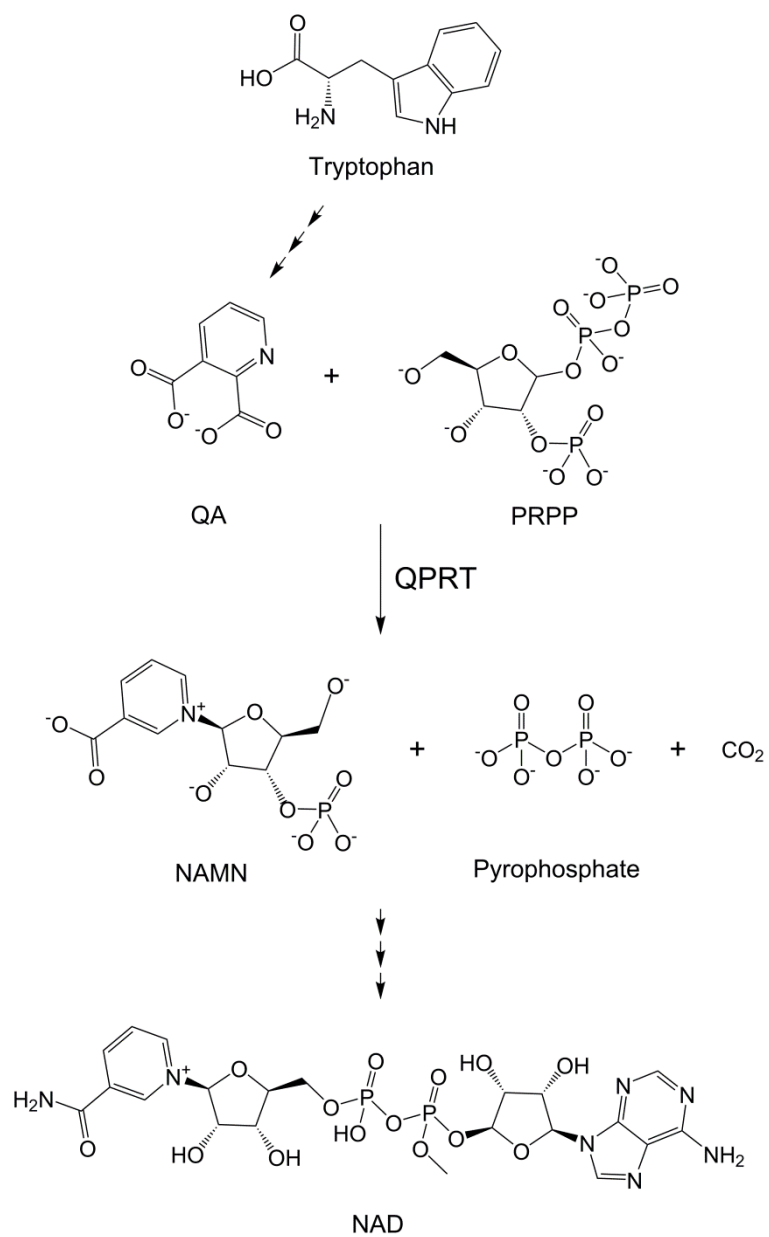

Supplementary Figure S1. Reaction catalyzed by QPRT.

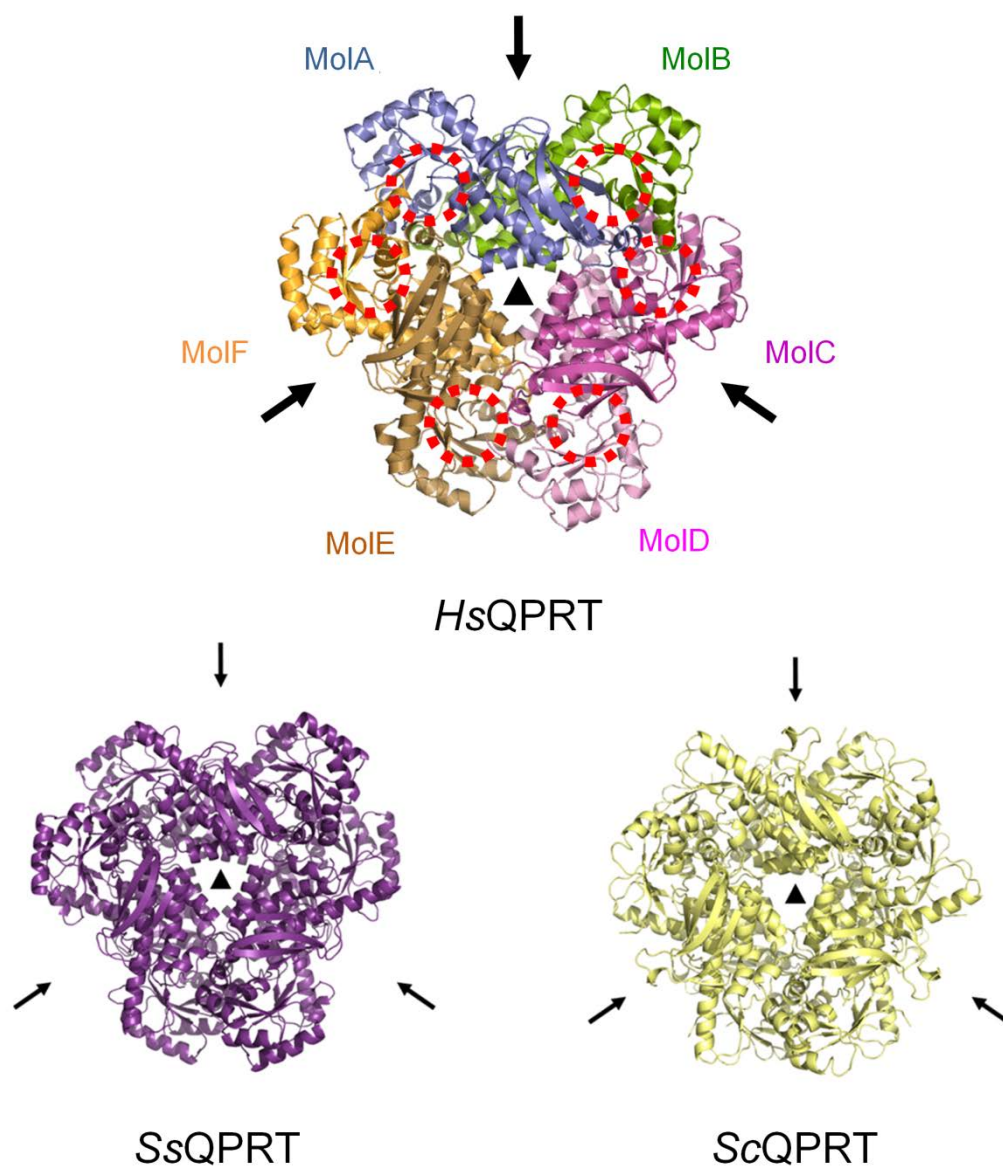

**Supplementary Figure S2.** Hexameric or dimeric biological units of QPRTs from human and other eukaryotes (*Sus scrofa*, *Ss*; *Saccharomyces cerevisiae*, *Sc*). The two- and three-fold axes of the hexamer are indicated as arrows and triangle, respectively. Active sites in *HsQPRT* are indicated as dashed circles.

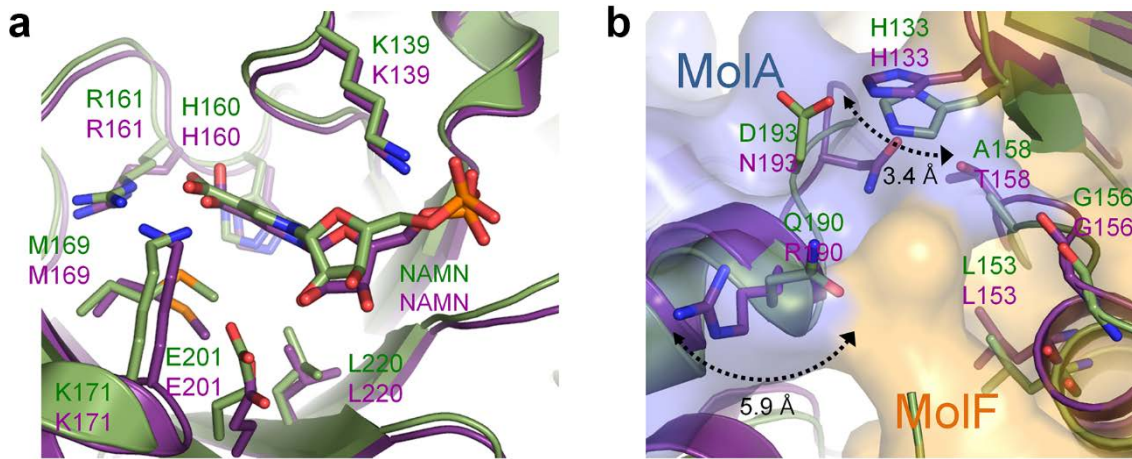

**Supplementary Figure S3.** Structural comparison of NAMN complexes of human (green) and porcine (purple) QPRTs in the NAMN binding site (a) and dimer-dimer interface (b). The movements are shown as two-sided arrows.

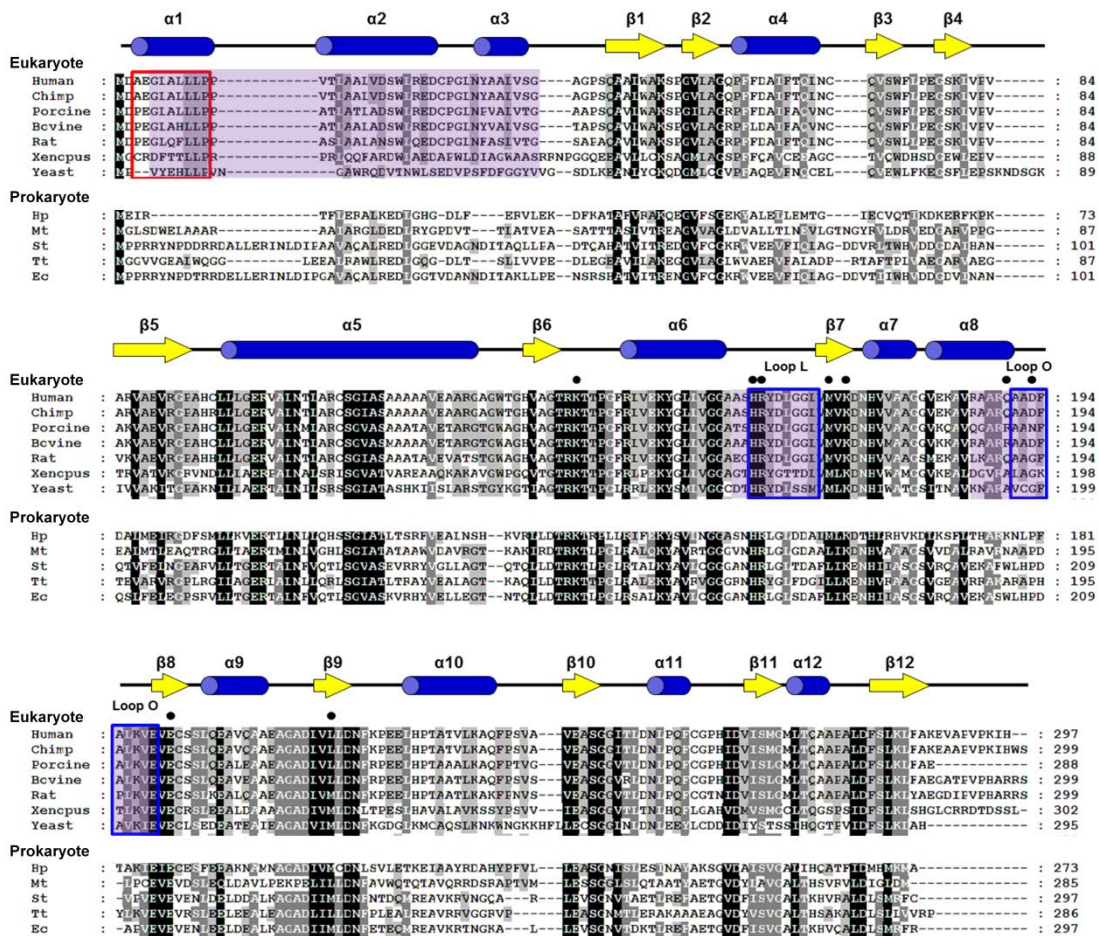

**Supplementary Figure S4.** Multiple sequence alignment of *HsQPRT* homologs. Conserved residues are indicated as white letters in the black and gray background. The blue cylinders and yellow arrows represent  $\alpha$ -helices and strands of human enzyme, respectively. The black lines indicate loops. The accession number and database of aligned sequences are indicated in parentheses: *Homo sapiens* QPRT, Human (Uniprot code Q15274); *Pan troglodytes* QPRT, Chimp (Uniprot code K7ACA5); *Sus scrofa* QPRT, porcine (PDB code 4I9A); *Bos taurus* QPRT, Bovine (NCBI code AAI02551); *Rattus norvegicus* QPRT, Rat (NCBI code AAH88177); *Xenopus laevis* QPRT, Xenopus (Uniprot code Q6AZR1); *Saccharomyces cerevisiae* QPRT, Yeast (PDB code 3C2E); *Helicobacter pylori* QPRT, Hp (PDB code 2B7N); *Mycobacterium tuberculosis* QPRT, Mt (PDB code 1QPO); *Salmonella typhimurium* QPRT, St (Uniprot code P30012); *Thermus thermophilus* QPRT, Tt (PDB code 1X1O); *Escherichia coli* QPRT, Ec (Uniprot code P30011). Blue boxes indicate residues of loop L and loop O involved in intermolecular interactions among MolA-MolF. The red box indicates the N-terminal helix  $\alpha 1$ . Residues involved in the active site are indicated as dots in the upper side. Regions involved in the dimer-dimer interface of *HsQPRT* are shaded in purple.

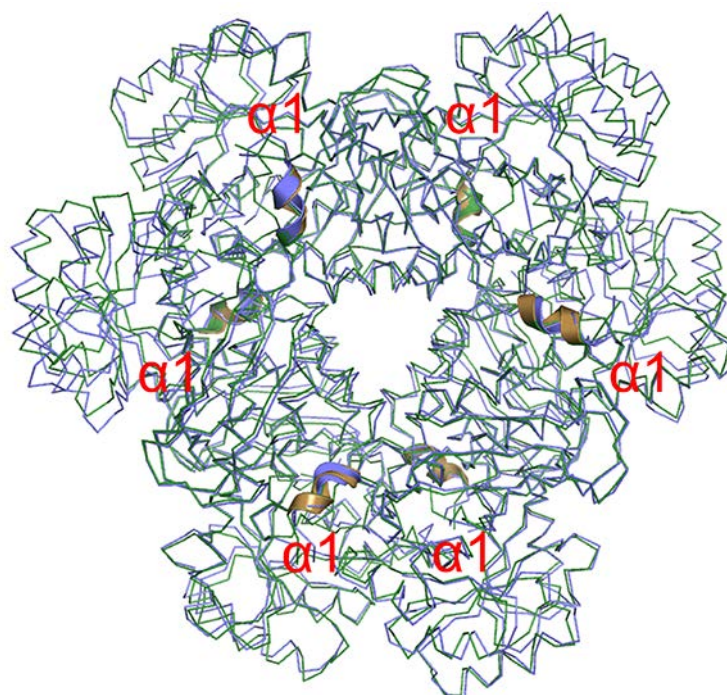

**Supplementary Figure S5.** Structural comparison of helix  $\alpha 1$  of *HsQPRT*-open (blue), *HsQPRT*-QA (brown) and *HsQPRT*-NAMN (green). Helix  $\alpha 1$  are shown as cartoon diagrams.

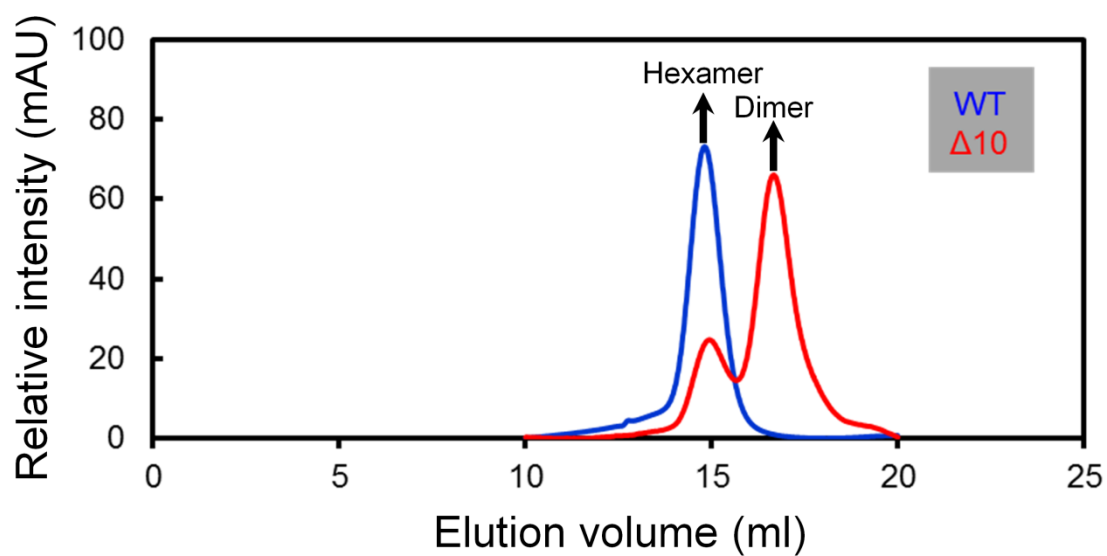

**Supplementary Figure S6.** Relatively compared size exclusion chromatographic profiles of wild-type of *ScQPRT* (blue) and its mutant ( $N\Delta 10^{Sc}$ , red). Blue and red peaks approximately correspond to a hexamer and dimer, similar to wild-type *HsQPRT* and its mutant  $N\Delta 12$ , respectively.

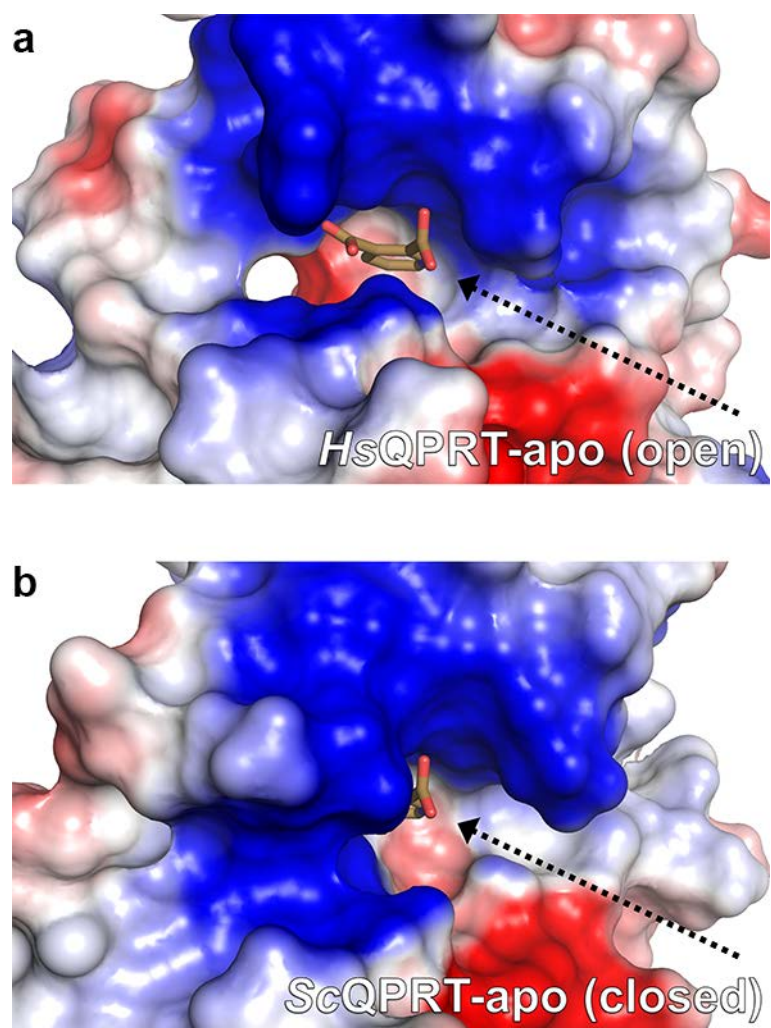

**Supplementary Figure S7.** Surface representations of QA binding pockets between *HsQPRT*-open (a) and *ScQPRT*-apo (b). Positive and negative surface charges of the protein are coloured in blue and red, respectively. The QA molecule (brown stick) is extracted from the *HsQPRT*-QA structure. Expected directions of QA access are shown as dashed arrows.



QA

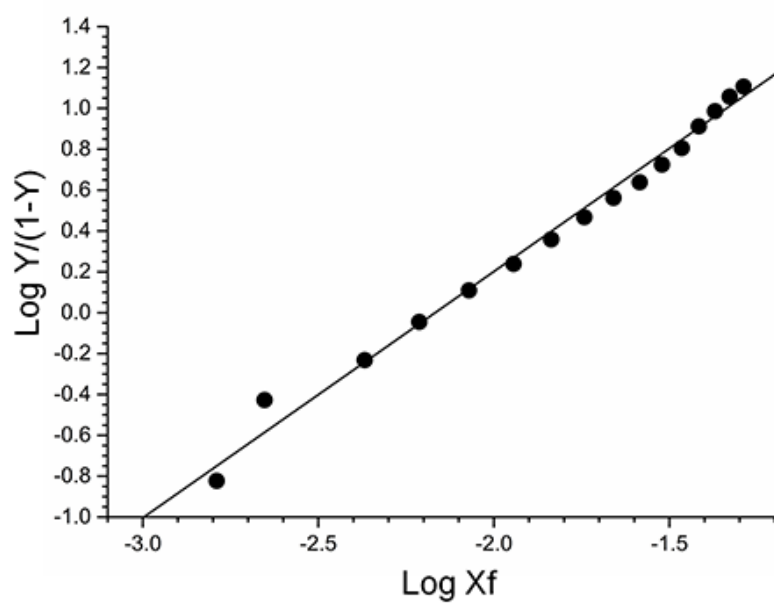

**Supplementary Figure S8.** Hill plot of QA binding to *HsQPRT* derived from the ITC data.

## Phthalic acid

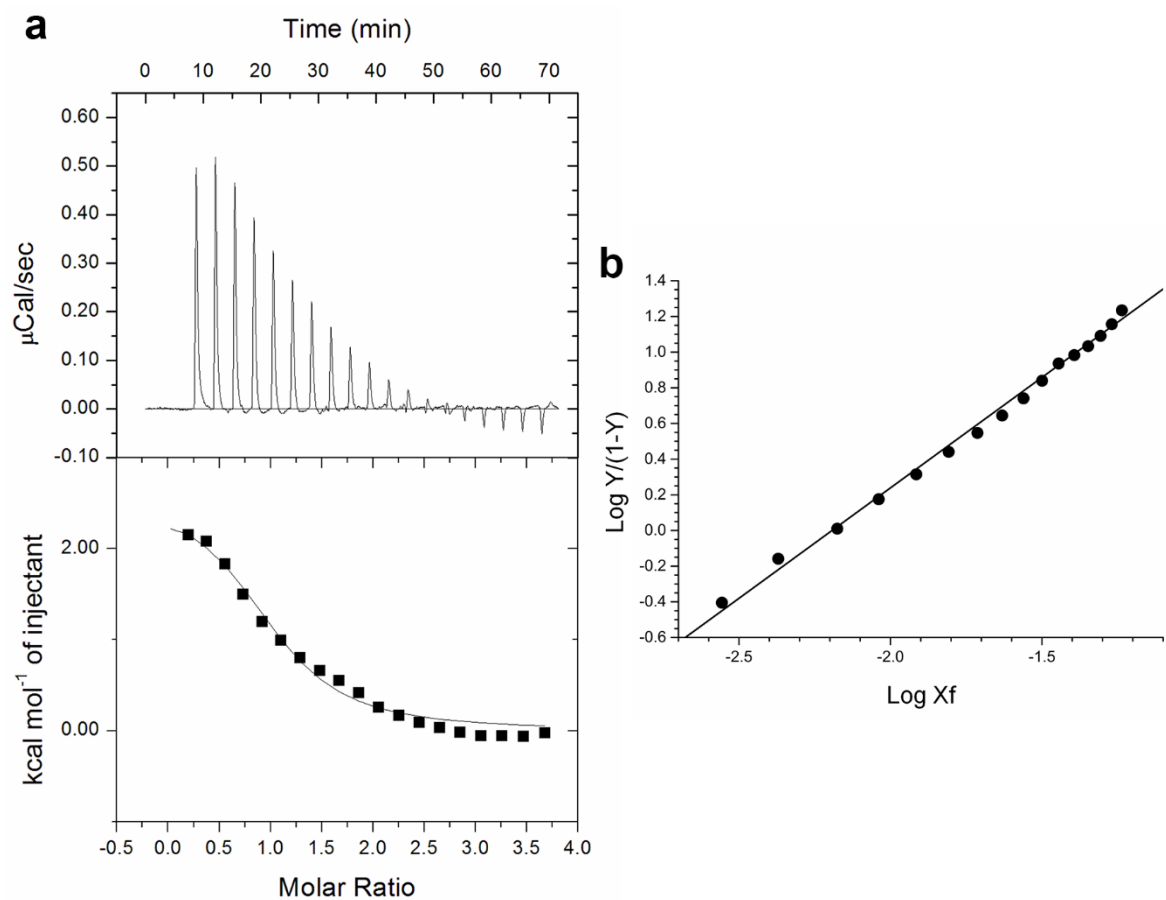

**Supplementary Figure S9.** (a) ITC profile for the binding of phthalic acid ( $500 \mu\text{M}$ ) to *HsQPRT* ( $30 \mu\text{M}$ ) with  $N$  (stoichiometry) = 1.0,  $K_d = \sim 5.2 \mu\text{M}$ ,  $\Delta H = \sim 2.4 \text{ kcal/mol}$  and  $\Delta S = \sim 33 \text{ cal/mol}$ . (b) Hill plot derived from the ITC data.

## PRPP

## PRPP under saturated phthalic acid

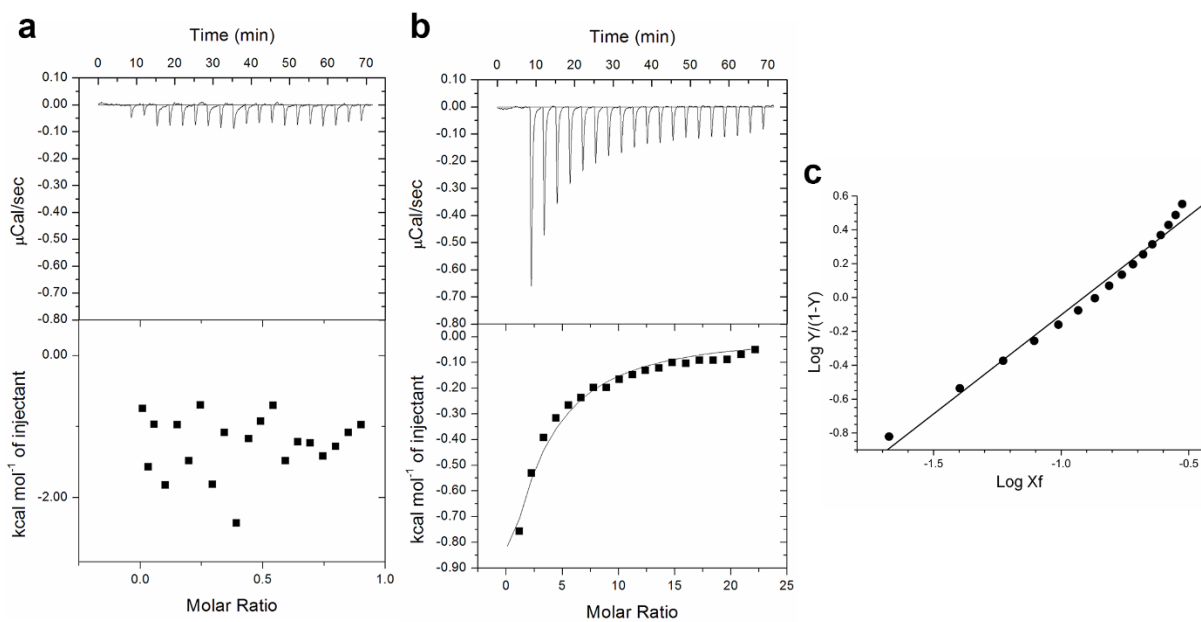

**Supplementary Figure S10.** (a) ITC profile for the binding of PRPP (2 mM) to *HsQPRT* (20 μM). (b) ITC profile for the binding of PRPP (2 mM) to *HsQPRT* (20 μM) under saturated phthalic acid (200 μM) with *N* (stoichiometry) = 1.0,  $K_d = \sim 124$  μM,  $\Delta H = \sim -6.7$  kcal/mol and  $\Delta S = \sim -4.8$  cal/mol. (c) Hill plot derived from the ITC data.

## Phthalic acid under saturated PRPP

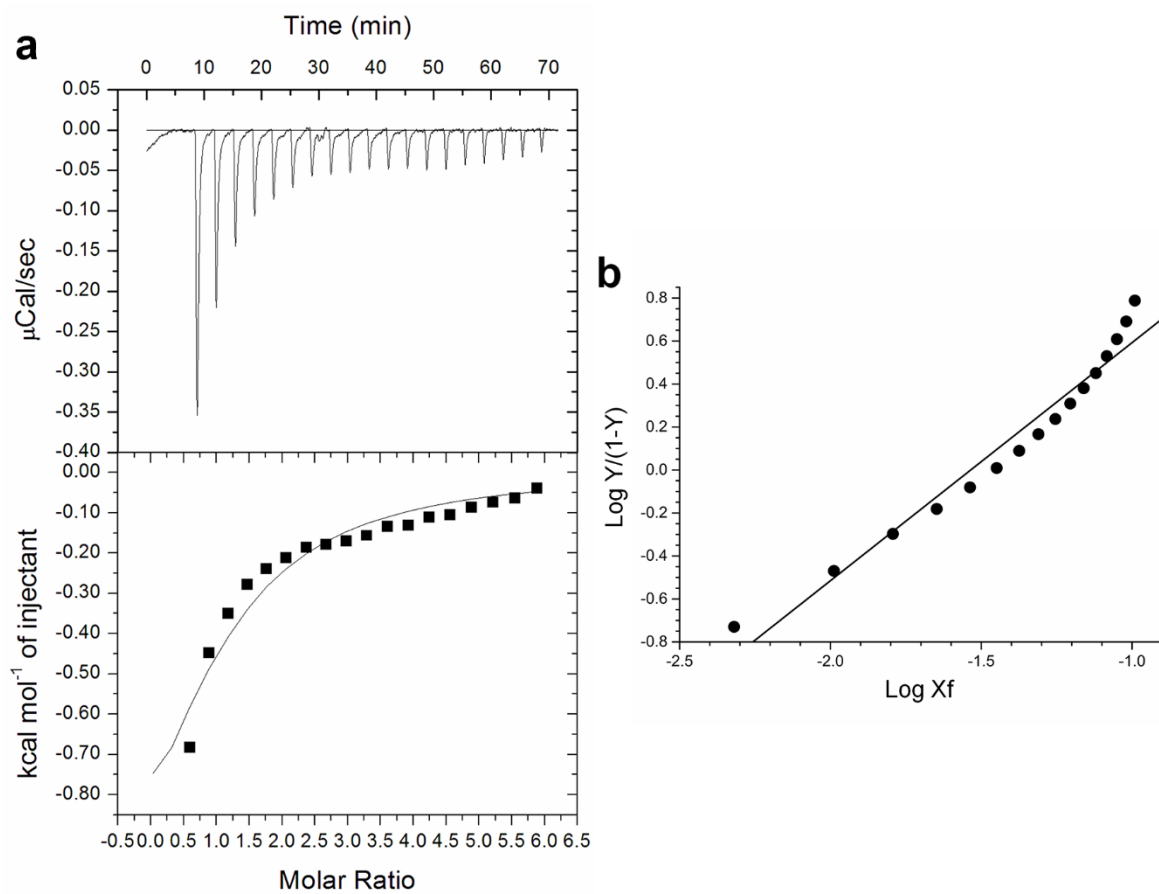

**Supplementary Figure S11.** (a) ITC profile for the binding of phthalic acid ( $800 \mu\text{M}$ ) to *HsQPRT* ( $30 \mu\text{M}$ ) under saturated PRPP ( $300 \mu\text{M}$ ) with  $N$  (stoichiometry) = 1.0,  $K_d = \sim 33 \mu\text{M}$ ,  $\Delta H = \sim -1.8 \text{ kcal/mol}$  and  $\Delta S = \sim -14.2 \text{ cal/mol}$ . (b) Hill plot derived from the ITC data.

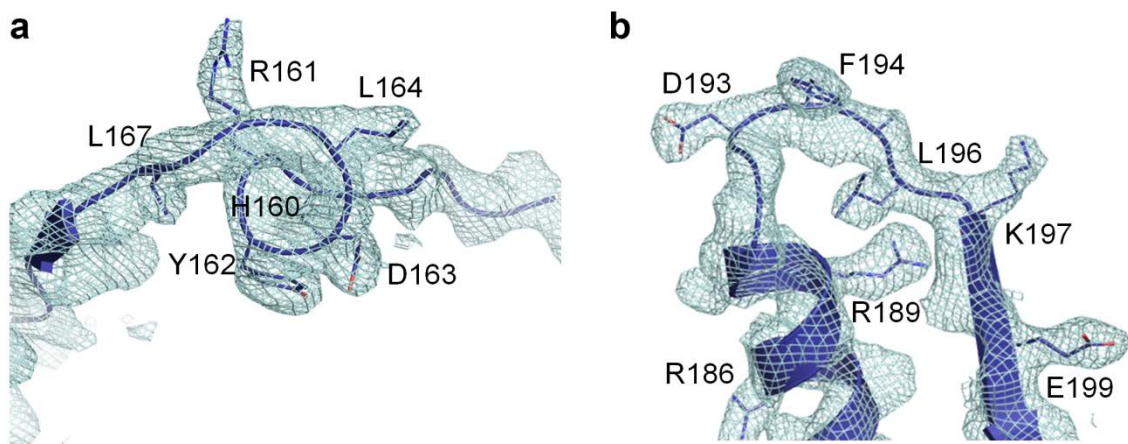

**Supplementary Figure S12.** The electron density corresponds to loop L (a) and loop O (b) of MolA of *HsQPRT*-open contoured at 1.0  $\sigma$ .

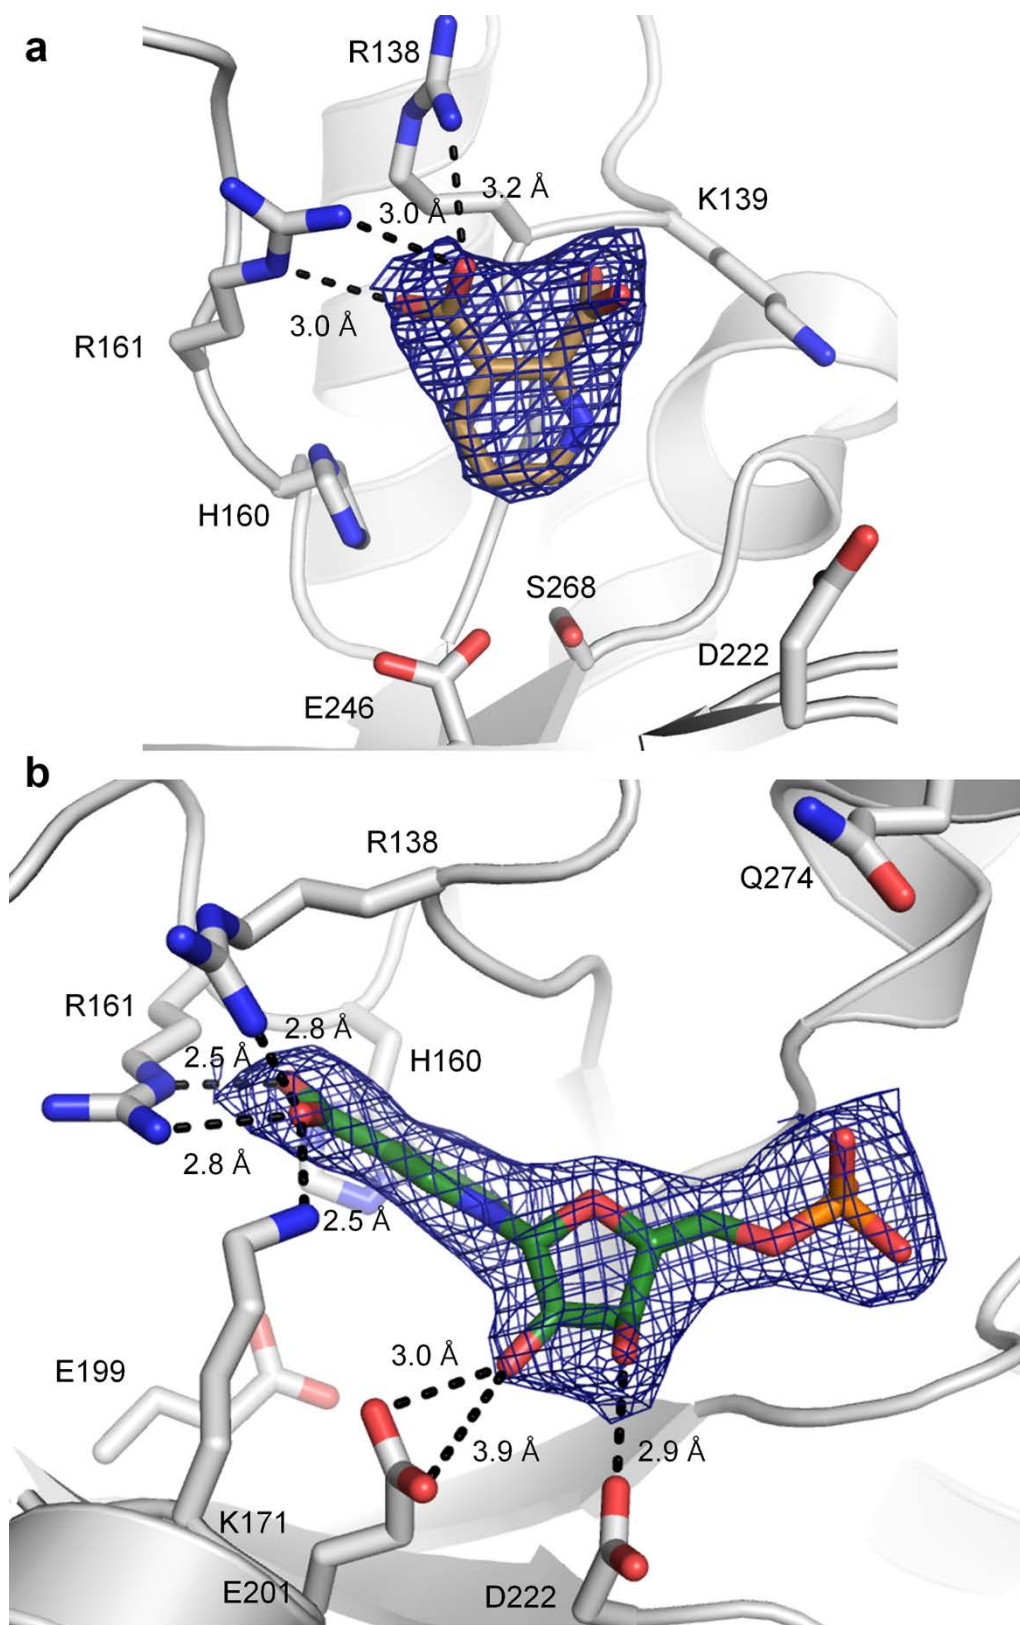

**Supplementary Figure S13.** Simulated-annealing composite omit map of QA (a) and NAMN (b) molecules. The electron density was contoured at  $1.0 \sigma$ . Hydrogen bonds are indicated as dashed lines.
